# Supplementary material for: Neural Adaptation at Stimulus Onset and Speed of Neural Processing as Critical Contributors to Speech Comprehension Independent of Hearing Threshold or Age
Source: MDPI journal article supplement (doi:10.3390/jcm13092725), 2024-05-06
Supplement: s1 [file s1]

## Supplementary Material

### DPOAE

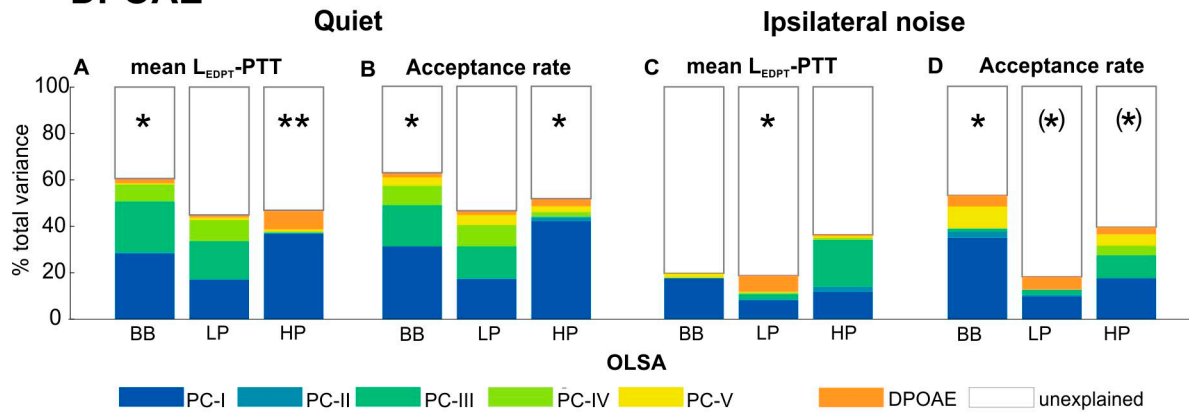

### ABR

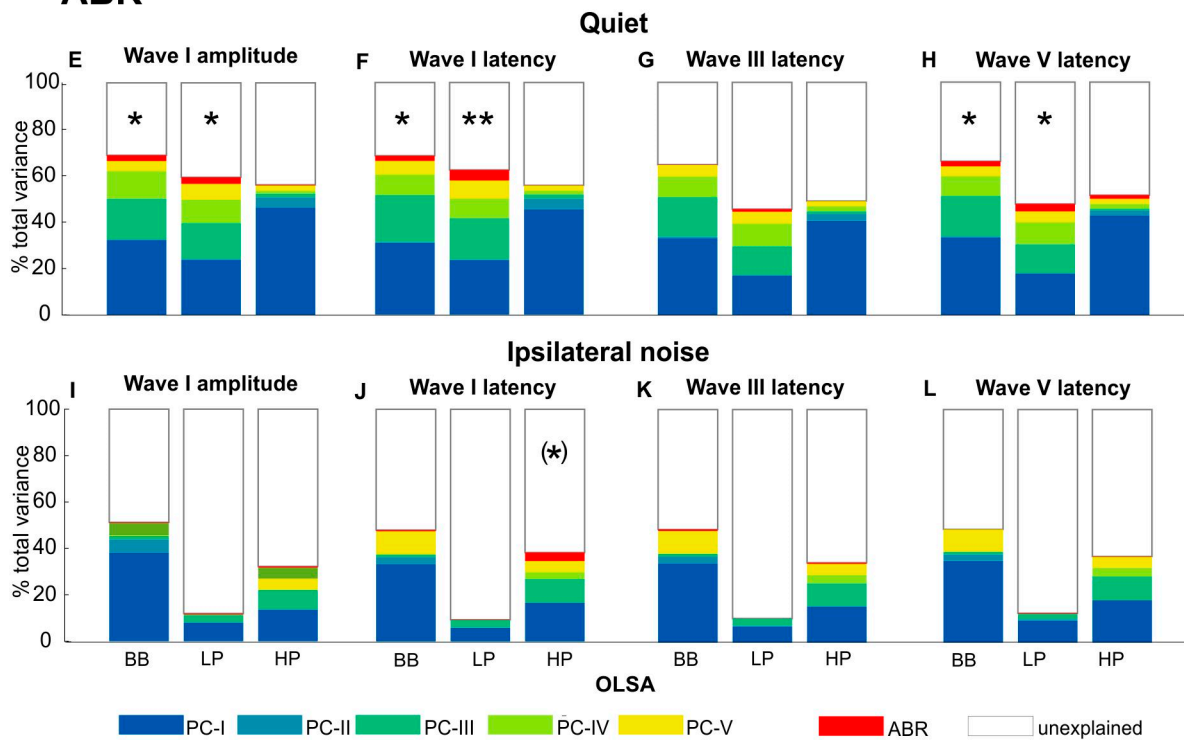

(\*) < 0.1 \* < 0.05 \*\* < 0.01

**Supplementary Figure S1.** Posthoc analysis of OLSA variance based on a linear mixed model **(A-D)** DPOAE:  $L_{EDPT}$ -PTT contributing 2% to OLSA-BB and 8.3% to OLSA-HP in quiet **(A)** and 7% (LP) in ipsilateral noise **(C)**. DPOAE acceptance rates **(B, D)** show that the number of valid  $L_{EDPT}$  measurements contributing **(B)** 2% OLSA-BB and 3.3% OLSA-HP in quiet and **(D)** 4,8% OLSA-BB in ipsilateral noise. **(E-L)** ABR wave I amplitude **(E, I)** and latencies for wave I **(F, J)**, II **(G, K)** and V **(H, L)** contributing to SRT variance (see Supplementary Table 3). Significance levels based on permutation testing: \*  $p < 0.05$  and \*\*  $p < 0.01$ . Tendencies with  $p < 0.1$  are marked with (\*).

**Supplementary Table S1.** Participant information to age, gender (female f, male m), handedness and results from depression evaluation according to Beck Depression Inventory II (BDI-II), Geriatric Depression Scale (GDS) as well as dementia test Mini Mental Status Examination (MMSE) and Tympanometry results.

| Proband | Age | Gender | Handedness | BDI*     | GDS*          | MMSE | Tympanometry |
|---------|-----|--------|------------|----------|---------------|------|--------------|
| CS001   | 26  | f      | right      | minimal  | minimal       | 30   | Type A       |
| CS002   | 63  | f      | right      | minimal  | minimal       | 30   | Type A       |
| CS003   | 59  | m      | right      | minimal  | minimal       | 30   | Type A       |
| CS004   | 62  | m      | right      | minimal  | minimal       | 30   | Type A       |
| CS005   | 55  | f      | right      | minimal  | minimal       | 30   | Type A       |
| CS006   | 60  | f      | right      | mild     | minimal       | 30   | Type A       |
| CS007   | 38  | f      | right      | minimal  | minimal       | 30   | Type A       |
| CS008   | 48  | f      | right      | moderate | mild/moderate | 30   | Type B       |
| CS009   | 21  | f      | right      | minimal  | minimal       | 30   | Type A       |
| CS010   | 47  | f      | right      | minimal  | minimal       | 30   | Type A       |
| CS011   | 19  | f      | right      | minimal  | minimal       | 30   | Type C       |
| CS012   | 22  | m      | right      | minimal  | minimal       | 29   | Type A       |
| CS013   | 26  | f      | right      | minimal  | minimal       | 30   | Type A       |
| CS014   | 25  | m      | right      | minimal  | minimal       | 30   | Type A       |
| CS015   | 25  | m      | right      | mild     | minimal       | 30   | Type A       |
| CS018   | 24  | m      | right      | minimal  | minimal       | 29   | Type A       |
| CS023   | 69  | m      | right      | moderate | mild/moderate | 29   | Type A       |
| CS025   | 64  | f      | right      | minimal  | minimal       | 28   | Type A       |
| CS027   | 60  | f      | right      | minimal  | minimal       | 30   | Type A       |
| CS029   | 64  | m      | right      | minimal  | minimal       | 29   | Type A       |
| CS030   | 23  | f      | right      | minimal  | minimal       | 30   | Type A       |
| CS031   | 53  | m      | right      | minimal  | minimal       | 29   | Type A       |
| CS033   | 26  | f      | right      | minimal  | minimal       | 29   | Type A       |
| CS034   | 24  | f      | right      | minimal  | minimal       | 29   | Type A       |
| CS035   | 45  | m      | right      | minimal  | minimal       | 28   | Type A       |
| CS037   | 45  | m      | right      | minimal  | minimal       | 29   | Type A       |
| CS038   | 57  | f      | right      | minimal  | minimal       | 30   | Type A       |
| CS039   | 18  | f      | right      | minimal  | minimal       | 29   | Type A       |
| CS040   | 57  | f      | right      | minimal  | minimal       | 30   | Type A       |
| CS041   | 58  | f      | right      | minimal  | minimal       | 30   | Type A       |
| CS042   | 54  | f      | right      | mild     | minimal       | 29   | Type AS      |
| CS044   | 62  | f      | right      | minimal  | minimal       | 30   | Type AS      |
| CS047   | 55  | m      | right      | minimal  | minimal       | 29   | Type A       |
| CS050   | 62  | f      | right      | minimal  | minimal       | 29   | Type A       |
| CS051   | 29  | m      | left       | mild     | minimal       | 30   | Type AS      |
| CS053   | 19  | m      | right      | moderate | mild/moderate | 30   | Type A       |
| CS056   | 28  | f      | right      | minimal  | minimal       | 30   | Type A       |
| CS057   | 28  | f      | right      | minimal  | minimal       | 29   | Type AD      |
| CS058   | 21  | f      | right      | minimal  | minimal       | 30   | Type A       |
| CS059   | 29  | m      | left       | minimal  | minimal       | 29   | Type A       |
| CS060   | 24  | f      | right      | minimal  | minimal       | 29   | Type AD      |
| CS061   | 58  | f      | right      | minimal  | minimal       | 30   | Type A       |
| CS062   | 52  | f      | right      | minimal  | minimal       | 30   | Type A       |

|       |    |   |       |          |               |    |         |
|-------|----|---|-------|----------|---------------|----|---------|
| CS063 | 28 | m | right | minimal  | minimal       | 30 | Type A  |
| CS065 | 23 | f | right | minimal  | minimal       | 29 | Type A  |
| CS066 | 70 | m | right | minimal  | minimal       | 30 | Type AD |
| CS067 | 33 | m | right | mild     | minimal       | 30 | Type AD |
| CS068 | 52 | f | right | minimal  | minimal       | 30 | Type A  |
| CS069 | 24 | f | right | minimal  | minimal       | 30 | Type A  |
| CS070 | 20 | f | left  | mild     | mild/moderate | 28 | Type A  |
| CS071 | 60 | f | right | minimal  | minimal       | 30 | Type A  |
| CS073 | 43 | f | right | minimal  | minimal       | 29 | Type A  |
| CS074 | 21 | m | right | moderate | mild/moderate | 29 | Type A  |
| CS075 | 54 | f | right | minimal  | minimal       | 30 | Type A  |
| CS076 | 30 | m | right | minimal  | minimal       | 30 | Type A  |
| CS077 | 52 | f | right | minimal  | minimal       | 30 | Type A  |
| CS078 | 35 | m | right | minimal  | minimal       | 30 | Type A  |
| CS079 | 34 | f | right | minimal  | minimal       | 28 | Type A  |
| CS080 | 35 | m | left  | minimal  | minimal       | 30 | Type A  |
| CS081 | 54 | f | right | minimal  | minimal       | 30 | Type A  |
| CS082 | 48 | f | right | minimal  | minimal       | 29 | Type AD |
| CS083 | 76 | m | right | minimal  | minimal       | 29 | Type A  |
| CS084 | 54 | f | right | minimal  | minimal       | 30 | Type A  |
| CS085 | 40 | f | right | minimal  | minimal       | 28 | Type A  |
| CS086 | 56 | f | right | minimal  | minimal       | 30 | Type AD |
| CS087 | 32 | f | right | minimal  | minimal       | 29 | Type A  |
| CS088 | 30 | f | right | minimal  | minimal       | 29 | Type A  |
| CS089 | 53 | f | right | minimal  | minimal       | 30 | Type A  |
| CS090 | 56 | f | right | minimal  | minimal       | 30 | Type A  |
| CS091 | 30 | f | right | minimal  | minimal       | 30 | Type A  |
| CS093 | 40 | m | right | minimal  | minimal       | 30 | Type A  |
| CS095 | 50 | m | right | minimal  | minimal       | 29 | Type A  |
| CS096 | 51 | f | right | minimal  | minimal       | 30 | Type AS |
| CS097 | 40 | f | right | minimal  | minimal       | 30 | Type A  |
| CS098 | 54 | f | right | minimal  | minimal       | 30 | Type A  |
| CS099 | 27 | f | right | minimal  | minimal       | 29 | Type A  |
| CS100 | 25 | m | right | minimal  | minimal       | 30 | Type A  |
| CS101 | 46 | f | right | minimal  | minimal       | 30 | Type A  |
| CS102 | 21 | m | right | mild     | minimal       | 30 | Type A  |
| CS103 | 28 | f | right | minimal  | minimal       | 28 | Type A  |
| CS104 | 68 | f | right | minimal  | minimal       | 30 | Type AS |
| CS105 | 65 | m | left  | minimal  | minimal       | 30 | Type A  |
| CS106 | 23 | f | left  | minimal  | minimal       | 30 | Type A  |
| CS107 | 64 | m | right | minimal  | minimal       | 30 | Type B  |
| CS108 | 70 | f | right | minimal  | minimal       | 29 | Type A  |
| CS109 | 70 | w | right | minimal  | minimal       | 29 | Type A  |
| CS110 | 72 | m | right | minimal  | minimal       | 29 | Type AS |
| CS111 | 62 | m | right | minimal  | minimal       | 30 | Type A  |
| CS112 | 71 | f | right | minimal  | minimal       | 29 | Type As |

---

**Supplementary Table S2.** Frequencies of the first four formants (F1 - F4) for each individual vowel sound, measured in Hz.

|    | /o/   | /u/   | /i/  | /y/  |
|----|-------|-------|------|------|
| F1 | 380   | 200   | 350  | 350  |
| F2 | 750   | 750   | 1950 | 1780 |
| F3 | 3500  | 3500  | 2800 | 2100 |
| F4 | 10000 | 10000 | 4000 | 3000 |

**Supplementary Table S3** Posthoc analysis of OLSA variance based on a linear mixed model.

|                 |       |    | sign of correlation |    |    | Explained total Variance in % |      |     | Explain std dB |     |     | p value |       |       | Total std dB |     |      |
|-----------------|-------|----|---------------------|----|----|-------------------------------|------|-----|----------------|-----|-----|---------|-------|-------|--------------|-----|------|
|                 |       | N  | bb                  | lp | hp | bb                            | lp   | hp  | bb             | lp  | hp  | bb      | lp    | hp    | bb           | lp  | hp   |
| LEDPT-PTT       | Quiet | 81 | 1                   | 1  | 1  | 2.0                           | 1.2  | 8.3 | 0.8            | 0.7 | 4.8 | 0.033   | 0.161 | 0.001 | 5.5          | 6.6 | 16.6 |
|                 | Ipsi  | 56 | 1                   | 1  | 1  | 0.1                           | 7.0  | 0.7 | 0.0            | 0.3 | 0.5 | 0.783   | 0.037 | 0.519 | 1.1          | 1.3 | 6.0  |
| Number of DPOAE | Quiet | 88 | -1                  | -1 | -1 | 2.0                           | 1.8  | 3.3 | 0.8            | 0.9 | 3.2 | 0.037   | 0.105 | 0.019 | 5.9          | 6.7 | 17.8 |
|                 | Ipsi  | 63 | 1                   | 1  | 1  | 4.8                           | 5.5  | 3.1 | 0.3            | 0.3 | 1.1 | 0.023   | 0.051 | 0.079 | 1.4          | 1.3 | 6.1  |
| ABR amp I       | Quiet | 76 | -1                  | -1 | 1  | 2.5                           | 2.8  | 0.2 | 0.9            | 1.0 | 0.8 | 0.022   | 0.032 | 0.561 | 5.4          | 6.2 | 16.7 |
|                 | Ipsi  | 56 | -1                  | -1 | 1  | 0.3                           | 0.3  | 0.5 | 0.1            | 0.1 | 0.4 | 0.634   | 0.671 | 0.525 | 1.5          | 1.3 | 6.0  |
| ABR lat I       | Quiet | 80 | 1                   | 1  | -1 | 2.2                           | 4.6  | 0.1 | 0.8            | 1.3 | 0.5 | 0.027   | 0.004 | 0.727 | 5.6          | 6.3 | 16.5 |
|                 | Ipsi  | 60 | -1                  | 1  | -1 | 0.5                           | 0.1  | 3.7 | 0.1            | 0.0 | 1.2 | 0.491   | 0.790 | 0.063 | 1.5          | 1.2 | 6.0  |
| ABR lat II      | Quiet | 62 | 1                   | 1  | 1  | 4.0                           | 4.3  | 2.1 | 1.0            | 1.2 | 2.3 | 0.018   | 0.053 | 0.128 | 5.2          | 5.8 | 16.1 |
|                 | Ipsi  | 47 | -1                  | 1  | -1 | 0.3                           | 0.2  | 3.6 | 0.1            | 0.1 | 1.1 | 0.675   | 0.745 | 0.110 | 1.6          | 1.2 | 5.9  |
| ABR lat III     | Quiet | 84 | 1                   | 1  | -1 | 0.1                           | 1.1  | 0.0 | 0.2            | 0.7 | 0.3 | 0.612   | 0.211 | 0.811 | 5.7          | 6.7 | 17.1 |
|                 | Ipsi  | 61 | 1                   | -1 | -1 | 0.7                           | 0.0  | 0.5 | 0.1            | 0.0 | 0.4 | 0.427   | 0.908 | 0.487 | 1.4          | 1.2 | 6.0  |
| ABR lat V       | Quiet | 86 | 1                   | 1  | 1  | 2.2                           | 3.2  | 1.6 | 0.8            | 1.2 | 2.2 | 0.024   | 0.030 | 0.112 | 5.6          | 6.6 | 17.6 |
|                 | Ipsi  | 62 | 1                   | -1 | -1 | 0.0                           | 0.3  | 0.1 | 0.0            | 0.1 | 0.2 | 0.858   | 0.667 | 0.720 | 1.4          | 1.3 | 6.2  |
| ABR lat VI      | Quiet | 78 | 1                   | 1  | 1  | 1.0                           | 2.0  | 4.2 | 0.5            | 0.9 | 3.3 | 0.153   | 0.105 | 0.011 | 5.4          | 6.7 | 16.2 |
|                 | Ipsi  | 58 | -1                  | -1 | -1 | 0.1                           | 0.4  | 0.3 | 0.1            | 0.1 | 0.3 | 0.726   | 0.613 | 0.650 | 1.4          | 1.3 | 5.9  |
| ASSR            | Quiet | 74 | 1                   | 1  | 1  | 0.4                           | 0.1  | 0.9 | 0.4            | 0.2 | 1.6 | 0.387   | 0.749 | 0.273 | 5.8          | 6.8 | 16.3 |
|                 | Ipsi  | 55 | 1                   | 1  | 1  | 7.0                           | 4.3  | 2.0 | 0.4            | 0.3 | 0.9 | 0.012   | 0.109 | 0.219 | 1.4          | 1.3 | 6.2  |
| ASSR 4k         | Quiet | 65 | 1                   | -1 | 1  | 0.0                           | 0.7  | 0.5 | 0.1            | 0.6 | 1.1 | 0.875   | 0.336 | 0.447 | 5.9          | 6.9 | 15.1 |
|                 | Ipsi  | 49 | 1                   | 1  | -1 | 0.3                           | 0.9  | 0.1 | 0.1            | 0.1 | 0.2 | 0.612   | 0.487 | 0.805 | 1.2          | 1.2 | 5.9  |
| ASSR 6k         | Quiet | 68 | 1                   | 1  | 1  | 1.2                           | 0.5  | 0.2 | 0.6            | 0.5 | 0.7 | 0.150   | 0.407 | 0.632 | 5.2          | 6.7 | 17.7 |
|                 | Ipsi  | 50 | 1                   | 1  | 1  | 3.8                           | 0.4  | 3.3 | 0.3            | 0.1 | 1.1 | 0.085   | 0.661 | 0.147 | 1.4          | 1.3 | 6.3  |
| di bi easy      | Quiet | 73 | -1                  | -1 | 1  | 2.3                           | 1.7  | 0.2 | 0.9            | 0.9 | 0.8 | 0.038   | 0.146 | 0.603 | 6.1          | 7.0 | 18.2 |
|                 | Ipsi  | 51 | -1                  | 1  | -1 | 0.1                           | 0.1  | 0.2 | 0.0            | 0.0 | 0.3 | 0.761   | 0.842 | 0.667 | 1.4          | 1.3 | 6.2  |
| ou difficult    | Quiet | 88 | -1                  | -1 | -1 | 2.0                           | 0.0  | 0.2 | 0.9            | 0.1 | 0.7 | 0.035   | 0.863 | 0.603 | 6.0          | 6.7 | 17.8 |
|                 | Ipsi  | 62 | -1                  | -1 | -1 | 0.4                           | 1.7  | 1.6 | 0.1            | 0.2 | 0.8 | 0.533   | 0.289 | 0.216 | 1.4          | 1.3 | 6.2  |
| ou easy         | Quiet | 88 | -1                  | -1 | -1 | 2.0                           | 0.7  | 1.2 | 0.8            | 0.5 | 1.9 | 0.039   | 0.319 | 0.169 | 6.0          | 6.7 | 17.8 |
|                 | Ipsi  | 62 | 1                   | 1  | -1 | 0.1                           | 0.0  | 0.7 | 0.0            | 0.0 | 0.5 | 0.765   | 0.899 | 0.406 | 1.4          | 1.3 | 6.2  |
| iy difficult    | Quiet | 88 | -1                  | -1 | -1 | 0.6                           | 0.5  | 0.5 | 0.5            | 0.5 | 1.2 | 0.256   | 0.384 | 0.398 | 6.0          | 6.7 | 17.8 |
|                 | Ipsi  | 62 | -1                  | 1  | -1 | 4.1                           | 0.1  | 2.6 | 0.3            | 0.0 | 1.0 | 0.041   | 0.748 | 0.106 | 1.4          | 1.3 | 6.2  |
| iy easy         | Quiet | 88 | 1                   | 1  | -1 | 0.0                           | 0.1  | 0.5 | 0.1            | 0.2 | 1.3 | 0.892   | 0.664 | 0.359 | 6.0          | 6.7 | 17.8 |
|                 | Ipsi  | 62 | -1                  | 1  | -1 | 1.3                           | 0.3  | 1.0 | 0.2            | 0.1 | 0.6 | 0.248   | 0.680 | 0.334 | 1.4          | 1.3 | 6.2  |
| UCL 250         | Quiet | 55 | -1                  | 1  | 1  | 0.0                           | 0.0  | 0.1 | 0.1            | 0.1 | 0.6 | 0.853   | 0.839 | 0.729 | 6.2          | 7.2 | 15.9 |
| UCL 250         | Ipsi  | 42 | 1                   | 1  | -1 | 0.0                           | 10.1 | 0.7 | 0.0            | 0.4 | 0.5 | 0.969   | 0.024 | 0.497 | 1.5          | 1.2 | 6.2  |
| UCL 500         | Quiet | 69 | -1                  | 1  | 1  | 0.0                           | 0.0  | 1.5 | 0.1            | 0.1 | 2.1 | 0.863   | 0.839 | 0.182 | 6.2          | 7.2 | 17.4 |

|          |       |    |    |    |    |     |     |     |     |     |     |       |       |       |     |     |      |
|----------|-------|----|----|----|----|-----|-----|-----|-----|-----|-----|-------|-------|-------|-----|-----|------|
| UCL 500  | Ipsi  | 52 | 1  | 1  | -1 | 0.3 | 7.6 | 0.0 | 0.1 | 0.4 | 0.1 | 0.619 | 0.036 | 0.906 | 1.5 | 1.3 | 6.5  |
| UCL 1000 | Quiet | 72 | -1 | -1 | 1  | 0.2 | 0.1 | 1.9 | 0.3 | 0.2 | 2.4 | 0.544 | 0.726 | 0.117 | 6.2 | 7.1 | 17.8 |
| UCL 1000 | Ipsi  | 53 | 1  | 1  | -1 | 0.4 | 8.6 | 0.0 | 0.1 | 0.4 | 0.1 | 0.533 | 0.022 | 0.895 | 1.5 | 1.3 | 6.4  |
| UCL2000  | Quiet | 80 | -1 | -1 | 1  | 0.0 | 0.1 | 2.1 | 0.0 | 0.2 | 2.6 | 0.915 | 0.776 | 0.078 | 6.0 | 6.8 | 17.8 |
| UCL2000  | Ipsi  | 56 | 1  | 1  | -1 | 0.1 | 4.4 | 0.2 | 0.1 | 0.3 | 0.2 | 0.718 | 0.099 | 0.696 | 1.4 | 1.3 | 6.3  |
| UCL4000  | Quiet | 77 | 1  | 1  | 1  | 0.1 | 0.2 | 1.2 | 0.2 | 0.3 | 1.9 | 0.692 | 0.644 | 0.209 | 5.9 | 6.9 | 17.4 |
| UCL4000  | Ipsi  | 56 | 1  | 1  | -1 | 0.3 | 4.2 | 0.1 | 0.1 | 0.3 | 0.2 | 0.572 | 0.098 | 0.796 | 1.4 | 1.3 | 6.3  |
| UCL 6000 | Quiet | 42 | 1  | -1 | 1  | 0.1 | 0.5 | 1.0 | 0.2 | 0.6 | 1.9 | 0.782 | 0.616 | 0.417 | 7.1 | 8.4 | 19.0 |
| UCL 6000 | Ipsi  | 25 | -1 | -1 | -1 | 1.2 | 1.4 | 0.0 | 0.2 | 0.2 | 0.0 | 0.455 | 0.515 | 0.947 | 1.4 | 1.4 | 5.9  |

**Supplementary Table S4.** P-values for syllable discrimination scores for poor, standard, and good speech performers.

| listening condition |             | quiet         |                   |                   | ipsilateral noise masking |                   |                   |
|---------------------|-------------|---------------|-------------------|-------------------|---------------------------|-------------------|-------------------|
| group comparison    |             | poor vs. good | poor vs. standard | good vs. standard | poor vs. good             | poor vs. standard | good vs. standard |
| /o/ - /u/           | (difficult) | 0.059         | 0.011             | 0.159             | 0.032                     | 0.337             | 0.035             |
| /i/ - /y/           | (difficult) | 0.496         | 0.444             | 0.041             | 0.081                     | 0.031             | 0.433             |
| /du/ - /bu/         | (difficult) | (0.0314)      | (0.0584)          | 0.334             | 0.248                     | 0.448             | 0.233             |
| /di/ - /bi/         | (difficult) | 0.291         | 0.102             | 0.264             | 0.042                     | 0.187             | 0.189             |
| /o/ - /u/           | (easy)      | 0.007         | 0.001             | 0.264             | 0.212                     | 0.337             | 0.125             |
| /i/ - /y/           | (easy)      | 0.014         | 0.084             | 0.236             | 0.129                     | 0.248             | 0.356             |
| /du/ - /bu/         | (easy)      | 0.076         | 0.284             | 0.271             | 0.179                     | 0.061             | 0.245             |
| /di/ - /bi/         | (easy)      | 0.264         | 0.176             | 0.378             | 0.284                     | 0.326             | 0.492             |

**Supplementary material pDPOAE measurements**

Short-pulsed distortion-product otoacoustic emissions (pDPOAE) were measured to characterize the pre-neural state of the cochlea. Using a pulsed waveform for the second primary ( $f_2$ ), along with onset decomposition [1], a technique to capture the short-latency nonlinear-distortion (ND) component of the DPOAE [2], artefactual interference effects with the longer latency component can be safely avoided [3]. Extrapolated DPOAE thresholds based on semi-logarithmically scaled I/O functions have been shown to correlate nearly 1:1 with pure-tone threshold [1,4-6] when stimulus levels of both primaries are chosen according to a so-called scissors paradigm [7]. In contrast, DPOAE amplitudes as a stand-alone measure bear a more complicated, frequency- and level-dependent relationship to behavioral thresholds [1,4-6]. The standard deviation of the residual of the correlation between  $L_{EDPT}$  and pure-tone Békésy-tracking audiometry at  $f_2$  has been shown to range between 5 and 8 dB depending on frequency [1]. Most previous studies as e.g [4-7] used several criteria for I/O functions to be accepted, which effectively avoid hard-to-interpret DPOAE I/O functions that lead to large estimation errors at the cost of losing information. Of course, any inter-individual variation in synaptic and neural transmission as well as variation in performing the subjective threshold-detection task contributes to the prediction error. Thus, it is and has been understood that the measured DPOAE threshold is merely a predictor for the state of the cochlear amplifier, or, with other words, a predictor for the pre-neural input signal to the mechano-electrical transduction of the inner hair cells [1]. In the present study pDPOAE input-output (I/O) functions were measured at 8 frequencies ( $f_2=0.8, 1.2, 1.5, 2, 3, 4, 6, 8$  kHz) using an adaptive algorithm comprising at least four pDPOAE values. Estimated distortion-product thresholds ( $L_{EDPT}$ ) were derived from these ND-DPOAE based on linear regression to the semi-logarithmically scaled ND-DPOAE-I/O functions ( $p_{DP}$  [ $\mu$ Pa] vs.  $L_2$  [dB SPL], cf. [1,4].

The  $L_{EDPT}$  derived from ND-DPOAE I/O functions as well as so-called pDPOAE level maps have been shown to correlate in an almost 1:1 relationship with auditory thresholds with a hitherto exceptionally small standard deviation of the residual of approximately 6 dB [1,8] over a frequency range of at least 1–8 kHz, and to be highly reproducible [9].

pDPOAE were measured unilaterally with ER-10C probes (Etymotic Res., Elk Grove Village, IL). Calibration of the loudspeakers and the microphone included correction for probe-to-tympanic membrane transfer function based on an artificial ear simulator (B&K type 4157, Brüel & Kjær, Nærum, Denmark) and thus are considered to correspond to sound pressure at the tympanic membrane; for details of calibration procedures, see [1]. In order to be accepted, the linear regression to the experimentally obtained I/O function must fulfill several criteria, the most important being related to the quality of the regression procedure, namely regarding the squared correlation coefficient,  $r^2_{I/O} \geq 0.8$ , and the standard deviation of the  $L_{EDPT}$ ,  $\sigma_{EDPT} \leq 10$  dB (for further details, see [1]). The acceptance rate reported in the Results Section is then the ratio between accepted I/O functions within a group of  $n_g$  members across all eight frequencies and both ears, i.e.  $n_{acc}/(2*8*n_g)$ . Acceptance rate depends on DPOAE amplitudes, background noise, and the linearity of the measured I/O functions, to mention some important contributors. Two sets of interleaved presentations of four two-tone pulse pairs each were averaged over 100 ensembles, where one ensemble consists of four blocks with suitable phase shifts yielding a time-domain DPOAE response with vanishing contribution of the two stimulus tones, when averaged; this method is called primary-tone phase variation technique [10]. The first set comprised presentations with  $f_2=0.8, 1.5, 3,$  and  $6$  kHz in a block of 180 ms length, the second with  $f_2=1.2, 2, 4,$  and  $8$  kHz in a block of 120 ms length. The adaptive procedure started with  $L_2=45$  dB SPL for each  $f_2$ -pulse, followed by lower or higher stimulus levels depending on SNR, a minimum  $L_2$  step size of 3 dB, and estimations based on population data of I/O slopes [11]. To be accepted for the subsequent DPOAE threshold estimation, a single ND-DPOAE value requires signal to noise ratios (SNR)  $\geq 10$  dB.  $L_1$  values are chosen according to a frequency-specific scissor paradigm [1] aimed to equalize both travelling-wave amplitudes of the stimulus tones  $f_1$  and  $f_2$  at the  $f_2$ -place in the cochlea (cf. [8]).  $f_1$ -pulses were switched on 2.5 ms after corresponding  $f_2$ -pulses and presented with widths between 40 to 10 ms adjusted to ensure that intracochlearly the correspondent travelling wave has reached a steady state before the  $f_2$ -pulse is switched on.  $f_2$ -pulses had half-maximum widths decreasing from 11.9 to 3.0 ms with ramps decreasing from 4.6 to 1.2 ms for frequencies between 0.8 and 8 kHz, designed to roughly allow settling of the ND component of the DPOAE before the second component of the DPOAE, the coherent-reflection component, builds up, so that both components can be visually distinguished in the time domain [12].

### Study limits

A limitation to interpreting frequency-specific aspects of DPOAE I/O function acceptance rate in relation to phoneme discrimination is that the speech-intelligibility tests of the BB, LP, and HP conditions were presented at different intensities per frequency band because they were normalized so that the speech stimuli had the same overall perceptual levels. This may be a confounding effect, especially with respect to recruitment.

It is also important to note that the numbers for syllable-discrimination score in Figure 9 and Supplementary Table 4 are not corrected for multiple comparisons, and these effects were likely limited by saturation effects in task performance, resulting in a non-linear dependence, which our linear model of variance analysis may not have been able to capture optimally.

Moreover, limits in exceeding dimensions for statistical analysis allowed the variance analysis for phoneme discrimination only as a linear dependency between good and poor PNOT, but not for the non-linear contribution of phoneme discrimination deficits in participants with good against standard, or poor against standard speech comprehension. Differing from results obtained from non-linear dependence (Figure 9, Supplementary Table 4), the linear dependencies for phoneme contrasts in good and poor PNOT resulted in a significant explanation of variance in quiet for /di/-/bi/ easy by 2.3%, /o/-/u/ difficult 2%, for /o/-/u/ easy 2%, and in ipsilateral noise for /i/-/y/ difficult contributing to 4.1% of variance (Supplementary Table 3).



## References Supplementary section

1. Zelle, D.; Lorenz, L.; Thiericke, J.P.; Gummer, A.W.; Dalhoff, E. Input-output functions of the nonlinear-distortion component of distortion-product otoacoustic emissions in normal and hearing-impaired human ears. *J Acoust Soc Am* **2017**, *141*, 3203, doi:10.1121/1.4982923.
2. Shera, C.A.; Guinan, J.J., Jr. Evoked otoacoustic emissions arise by two fundamentally different mechanisms: a taxonomy for mammalian OAEs. *J Acoust.Soc.Am.* **1999**, *105*, 782-798.
3. Zelle, D.; Gummer, A.W.; Dalhoff, E. Extraction of distortion-product otoacoustic emission source components and its relevance for objective audiometry. *Procedia IUTAM* **2016**, doi:10.1121/1.4809772 [doi].
4. Boege, P.; Janssen, T. Pure-tone threshold estimation from extrapolated distortion product otoacoustic emission I/O-functions in normal and cochlear hearing loss ears. *J Acoust Soc Am* **2002**, *111*, 1810-1818.
5. Gorga, M.P.; Neely, S.T.; Dorn, P.A.; Hoover, B.M. Further efforts to predict pure-tone thresholds from distortion product otoacoustic emission input/output functions. *J.Acoust.Soc.Am.* **2003**, *113*, 3275-3284.
6. Johnson, T.A.; Neely, S.T.; Kopun, J.G.; Dierking, D.M.; Tan, H.; Converse, C.; Kennedy, E.; Gorga, M.P. Distortion product otoacoustic emissions: cochlear-source contributions and clinical test performance. *J.Acoust.Soc.Am.* **2007**, *122*, 3539-3553.
7. Kummer, P.; Janssen, T.; Arnold, W. The level and growth behavior of the 2 f<sub>1</sub>-f<sub>2</sub> distortion product otoacoustic emission and its relationship to auditory sensitivity in normal hearing and cochlear hearing loss. *J.Acoust.Soc.Am.* **1998**, *103*, 3431-3444.
8. Zelle, D.; Bader, K.; Dierkes, L.; Gummer, A.W.; Dalhoff, E. Derivation of input-output functions from distortion-product otoacoustic emission level maps. *The Journal of the Acoustical Society of America* **2020**, *147*, 3169-3187, doi:10.1121/10.0001142.
9. Bader, K.; Dierkes, L.; Braun, L.H.; Gummer, A.W.; Dalhoff, E.; Zelle, D. Test-retest reliability of distortion-product thresholds compared to behavioral auditory thresholds. *Hear Res* **2021**, *406*, 108232, doi:10.1016/j.heares.2021.108232.
10. Whitehead, M.L.; Stagner, B.B.; Martin, G.K.; Lonsbury-Martin, B.L. Visualization of the onset of distortion-product otoacoustic emissions, and measurement of their latency. *J Acoust Soc Am* **1996**, *100*, 1663-1679, doi:10.1121/1.416065.
11. Krokenberger, M. Adaptive DPOAE-Wachstumsfunktionen zur objektiven Hörschwellenschätzung bei normalhörenden und hörgeschädigten Ohren. Universität Tübingen, Tübingen, 2019.
12. Zelle, D.; Gummer, A.W.; Dalhoff, E. Extraction of otoacoustic distortion product sources using pulse basis functions. *J Acoust Soc Am* **2013**, *134*, EL64-69, doi:10.1121/1.4809772.
